# Supplementary material for: Crystal structure, tunable luminescence and energy transfer properties of Na3La(PO4)2:Tb3+,Eu3+phosphors
Source: Royal Society of Chemistry journal article supplement (doi:10.1039/c6ra26164g), 2016-12-05
Supplement: c6ra26164g1.pdf [file c6ra26164g1.pdf]

## Instrumental Parameters

### Instrument

Model: F-7000 FL Spectrophotometer

Serial Number: 2685-010

ROM Version: 5J14000 07

### Instrument Parameters

Measurement type: Wavelength scan

Scan mode: Emission

Data mode: Fluorescence

EX WL: 378.0 nm

EM Start WL: 398.0 nm

EM End WL: 736.0 nm

Scan speed: 1200 nm/min

Delay: 0.0 s

EX Slit: 2.5 nm

EM Slit: 10.0 nm

PMT Voltage: 400 V

Response: 0.01 s

Corrected spectra: Off

Shutter control: On

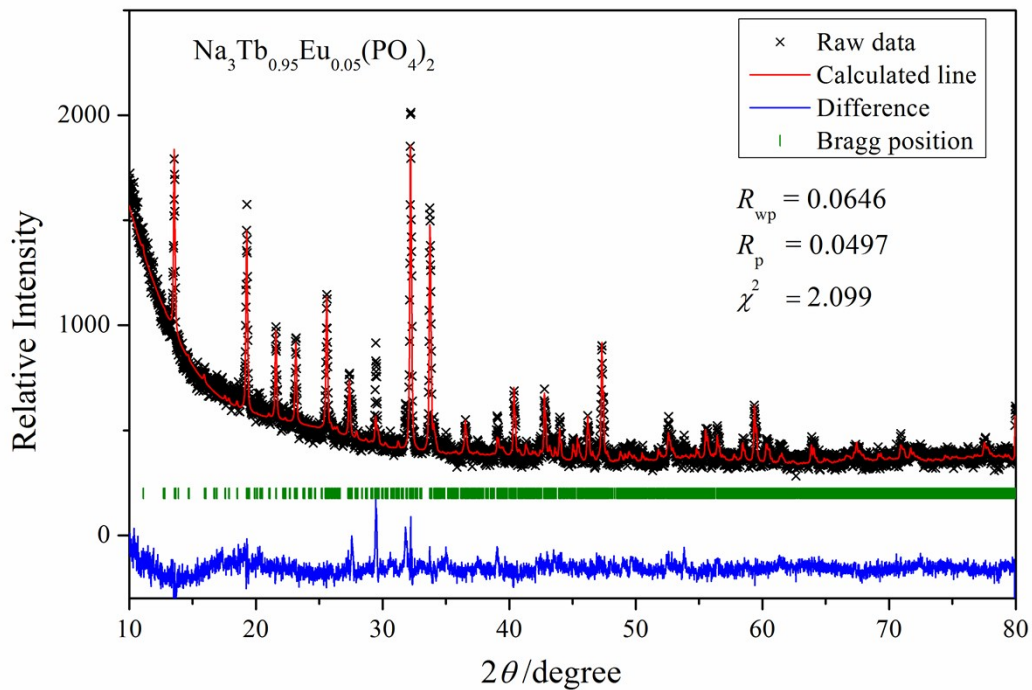

Fig S1 Rietveld refinement of the powder XRD pattern of  $\text{Na}_3\text{Tb}_{0.95}\text{Eu}_{0.5}(\text{PO}_4)_2$

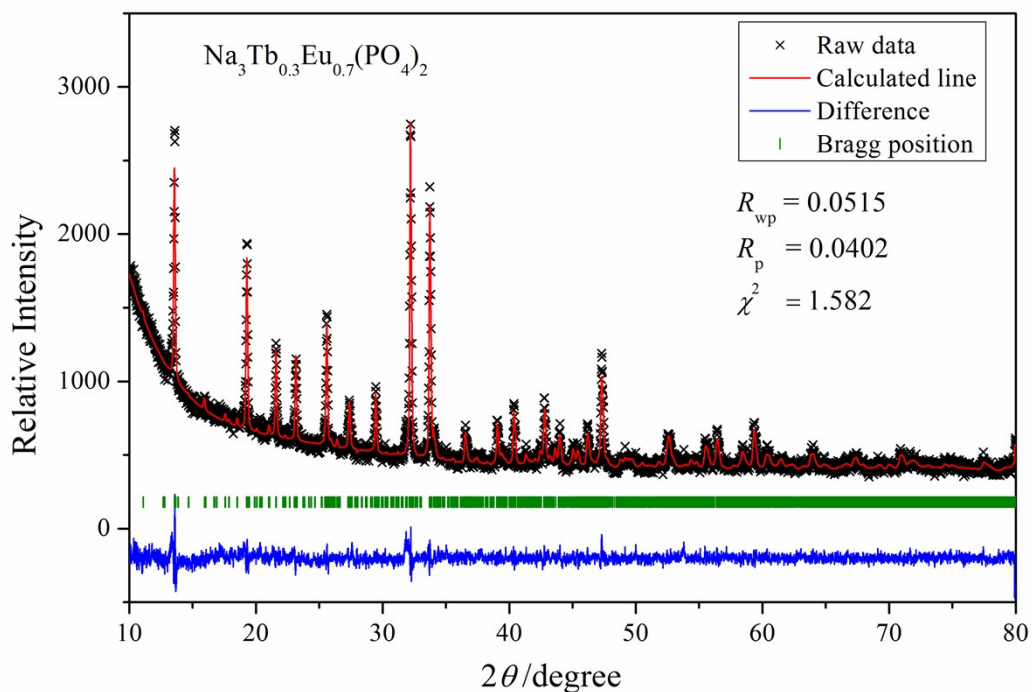

Fig S2 Rietveld refinement of the powder XRD pattern of  $\text{Na}_3\text{Tb}_{0.3}\text{Eu}_{0.7}(\text{PO}_4)_2$
